# Supplementary material for: Complementary behavior of doping and loading in Ag/C-ZnTa206 for efficient visible-light photocatalytic redox towards broad wastewater remediation
Source: Royal Society of Chemistry journal article supplement (doi:10.1039/d0pp00056f), 2020-06-12
Supplement: d0pp00056f1.pdf [file d0pp00056f1.pdf]

**Electronic Supplementary Information**

**Complementary Behavior of Doping and Loading in Ag/C-ZnTa<sub>2</sub>O<sub>6</sub>  
for Efficient Visible-light Photocatalytic Redox towards Broad  
Wastewater Remediation**

Niri Wu, Ping Bai, Ting Yang, Hui Li, Jingyu Zhang, Zhanli Chai\*, Xiaojing Wang

Inner Mongolia Key Laboratory of Chemistry and Physics of Rare Earth Materials, School of  
Chemistry and Chemical Engineering, Inner Mongolia University, Hohhot 010021, People's  
Republic of China

## 1. Experimental

### 1.1. Synthesis of the contrast catalysts

*Synthesis of C-ZnTa<sub>2</sub>O<sub>6</sub> loaded with Au or Pt (Au/C-ZnTa<sub>2</sub>O<sub>6</sub> and Pt/C-ZnTa<sub>2</sub>O<sub>6</sub>):*

0.10 g of pre-prepared C-ZnTa<sub>2</sub>O<sub>6</sub> powder was introduced into a quartz tube containing 20 mL deionized water and mixed with HAuCl<sub>4</sub>·4H<sub>2</sub>O (or H<sub>2</sub>PtCl<sub>6</sub>·6H<sub>2</sub>O, the mass ratio of Au/Pt is 10 wt.%) for 30 min to form a suspension in the dark. And the mixture is continued to be agitated for 2 h under the xenon lamp (500 W) irradiation. The product was filtered and washed by water for three times. The final products were dried in an oven at 60 °C for further characterization.

*Preparation of Ag/C-ZnTa<sub>2</sub>O<sub>6</sub> with different Ag contents:* 0.10 g of pre-prepared ZnTa<sub>2</sub>O<sub>6</sub> powder was introduced into the diluted AgNO<sub>3</sub> solution (1.0 g/L, 5 mL/10 mL/15 mL) and mixed for 30 min to form a suspension in the dark. And the mixture is continued to be agitated for 2 h under the xenon lamp (500 W) irradiation. The product was filtered and washed by water for three times until NO<sub>3</sub><sup>-</sup> was completely removed. The final products were dried in an oven at 60 °C. A series of Ag/ZnNb<sub>2</sub>O<sub>6</sub> catalysts were obtained by setting up the initial Ag contents to 5 wt.%, 10 wt.%, and 15 wt.%, respectively.

*Synthesis of Ag/Na<sub>2</sub>Ta<sub>2</sub>O<sub>6</sub>:* Typically, 0.266 g of tantalum hydroxide (Ta(OH)<sub>5</sub>, 1.0 mmol), 0.20 g sodium hydroxide (NaOH, 5.0 mmol), and 15.0 mL of deionized water were added into round-bottom flask followed by 10 min stirring under room temperature. And then the above mixture was transferred into a 30 mL Teflon lined autoclave, which was heated at 220 °C for 24 h. And 0.10 g of obtained precipitate

was mixed with  $\text{AgNO}_3$  solution (1.0 g/L, 10 mL, the initial content of Ag was set at 10 wt.%), and then followed the same procedure of Ag/C-ZnTa<sub>2</sub>O<sub>6</sub>.

*Synthesis of Ag/SiO<sub>2</sub>:* 0.10 g of purchased SiO<sub>2</sub> powder was introduced into the diluted  $\text{AgNO}_3$  solution (1.0 g/L, 10 mL, the initial content of Ag was set at 10 wt.%), , and then followed the same procedure of Ag/C-ZnTa<sub>2</sub>O<sub>6</sub>.

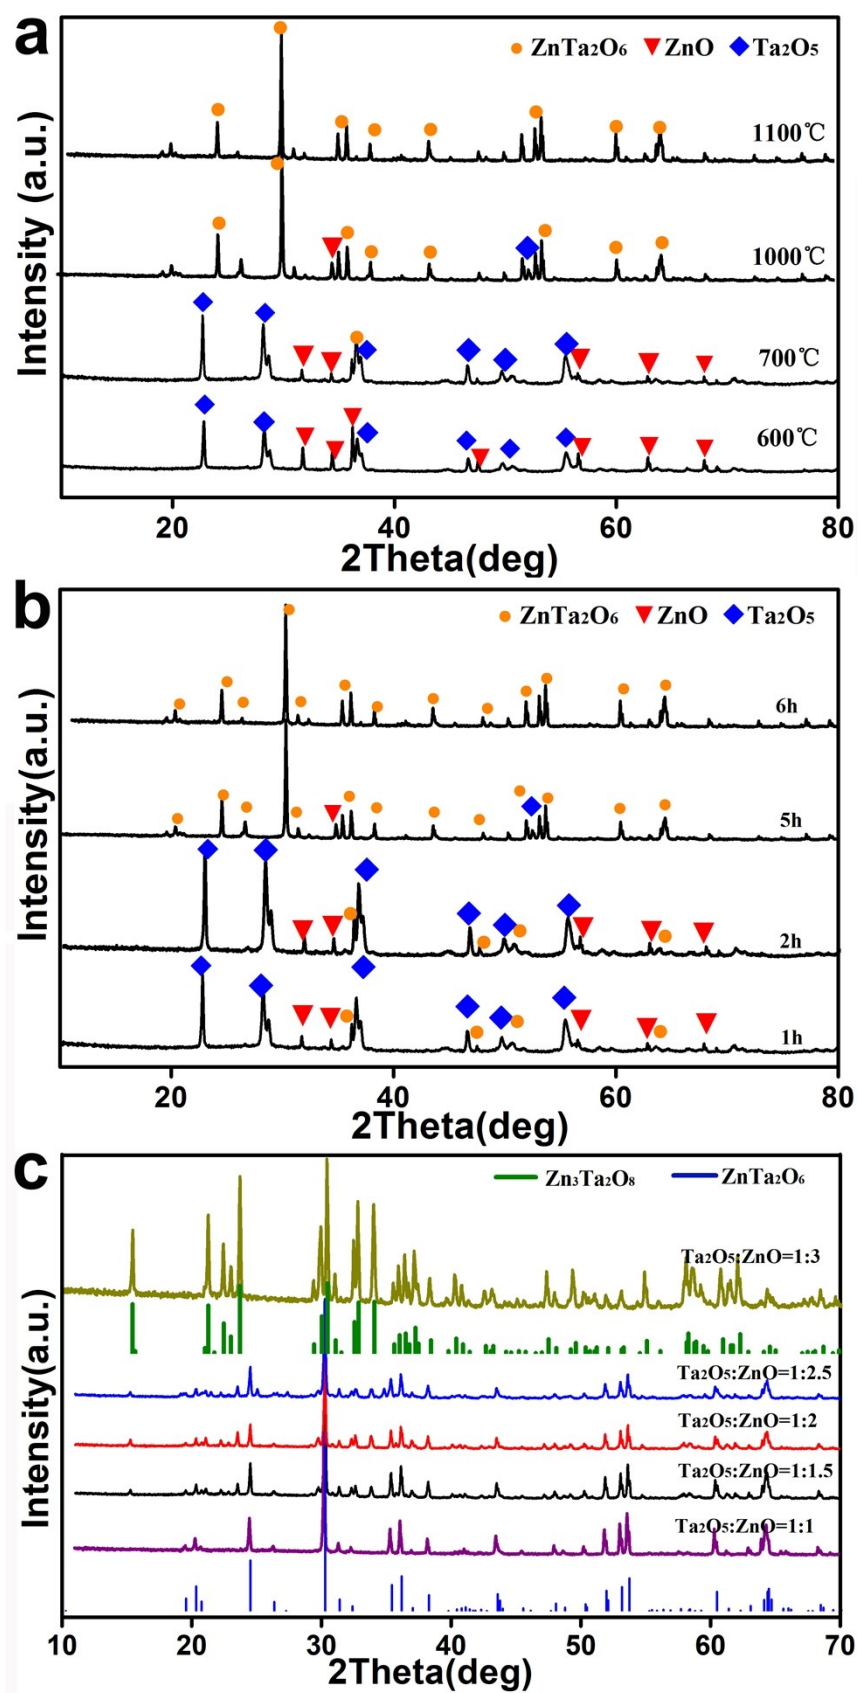

**Fig. S1.** XRD patterns of as-obtained products in typical synthesis with (a) different temperature, (b) duration, and (c) molar ratio of  $\text{Ta}_2\text{O}_5/\text{ZnO}$ .

**Table S1.** Carbon contents in C-ZnTa<sub>2</sub>O<sub>6</sub> and Ag/C-ZnTa<sub>2</sub>O<sub>6</sub> measured by XPS spectrum.

| Catalysts                             | Carbon content/ wt. % |
|---------------------------------------|-----------------------|
| C-ZnTa <sub>2</sub> O <sub>6</sub>    | 0.035                 |
| Ag/C-ZnTa <sub>2</sub> O <sub>6</sub> | 0.033                 |

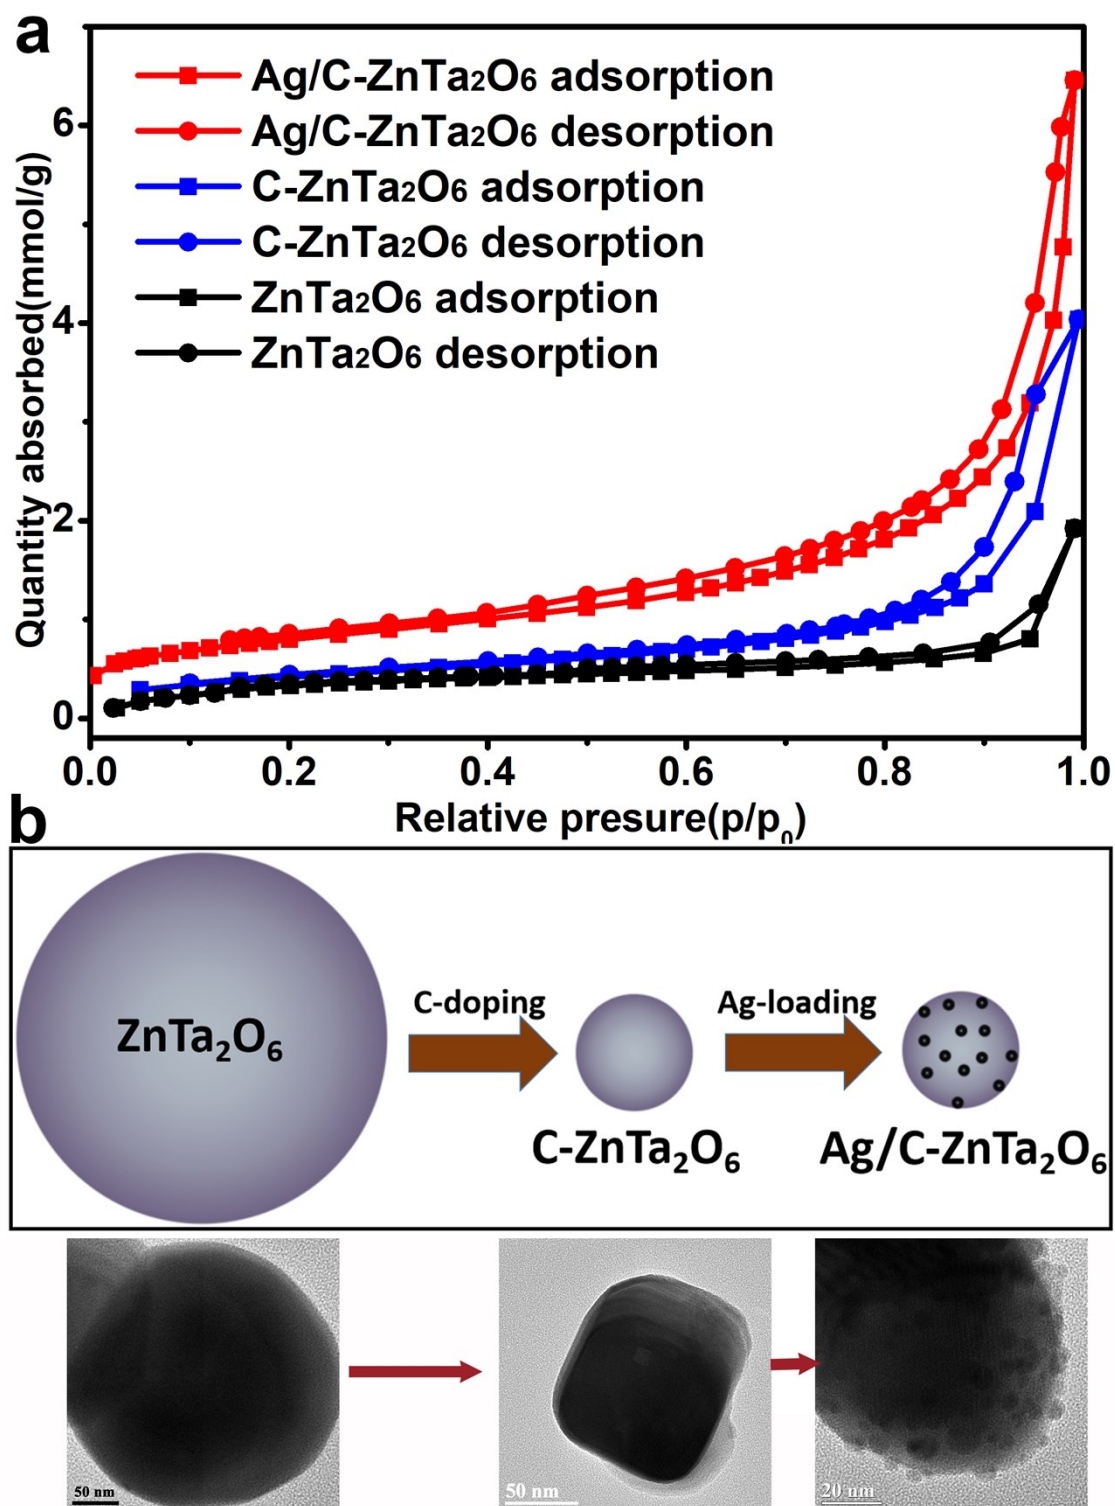

**Fig. S2.** (a) N<sub>2</sub> adsorption-desorption isotherms for as-synthesized pure ZnTa<sub>2</sub>O<sub>6</sub>, C-ZnTa<sub>2</sub>O<sub>6</sub> and Ag/C-ZnTa<sub>2</sub>O<sub>6</sub> in typical synthesis, and (b) schematic diagram of sample morphology and TEM images from pure ZnTa<sub>2</sub>O<sub>6</sub> to C-ZnTa<sub>2</sub>O<sub>6</sub> and then to Ag/C-ZnTa<sub>2</sub>O<sub>6</sub>.

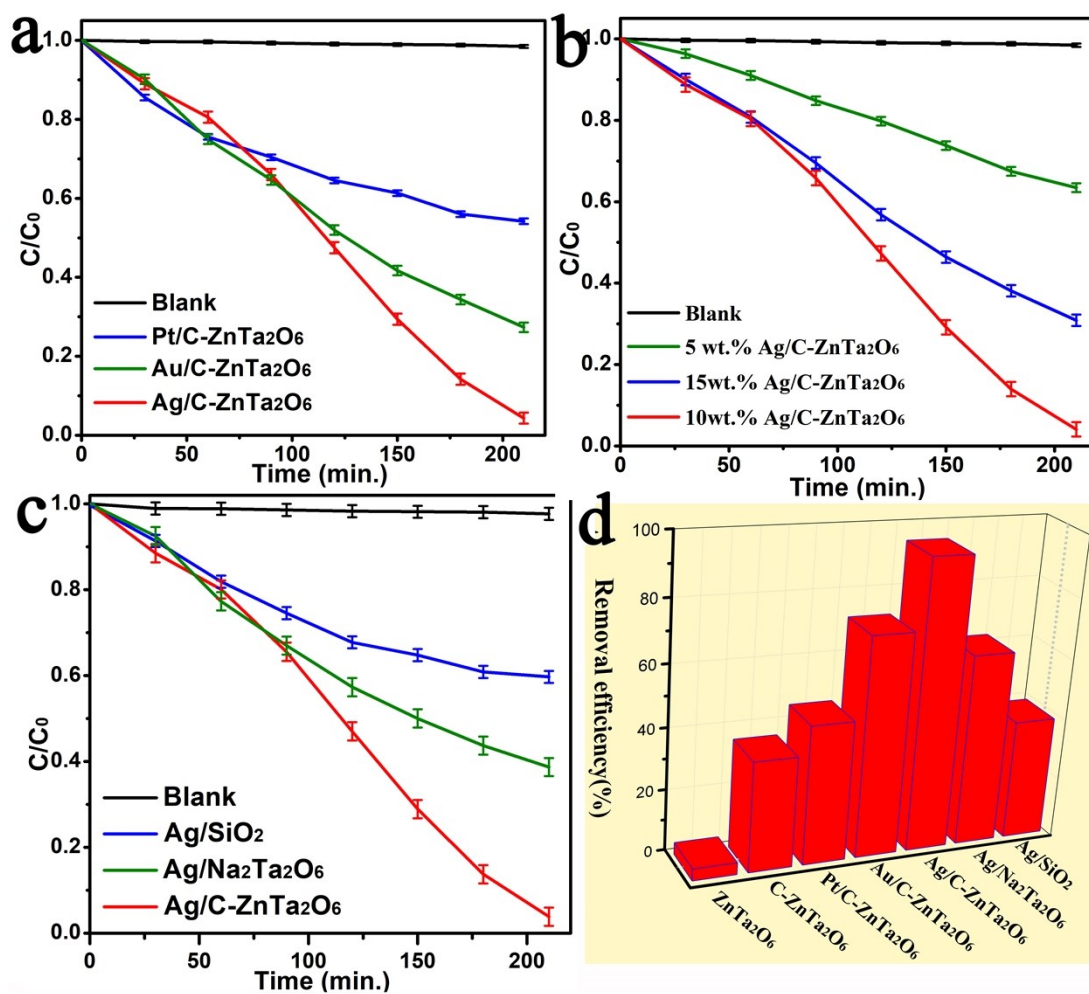

**Fig. S3.** The photocatalytic degradation of HCl-TC with (a) C-ZnTa<sub>2</sub>O<sub>6</sub> loaded with different noble metal (Pt, Au, Ag), (b) Ag/C-ZnTa<sub>2</sub>O<sub>6</sub> catalyst with different loading content of Ag, (c) Ag loaded with different supporters (Na<sub>2</sub>Ta<sub>2</sub>O<sub>6</sub>, SiO<sub>2</sub>, C-ZnTa<sub>2</sub>O<sub>6</sub>) (d) removal efficiency of different photocatalysts under visible light irradiation.

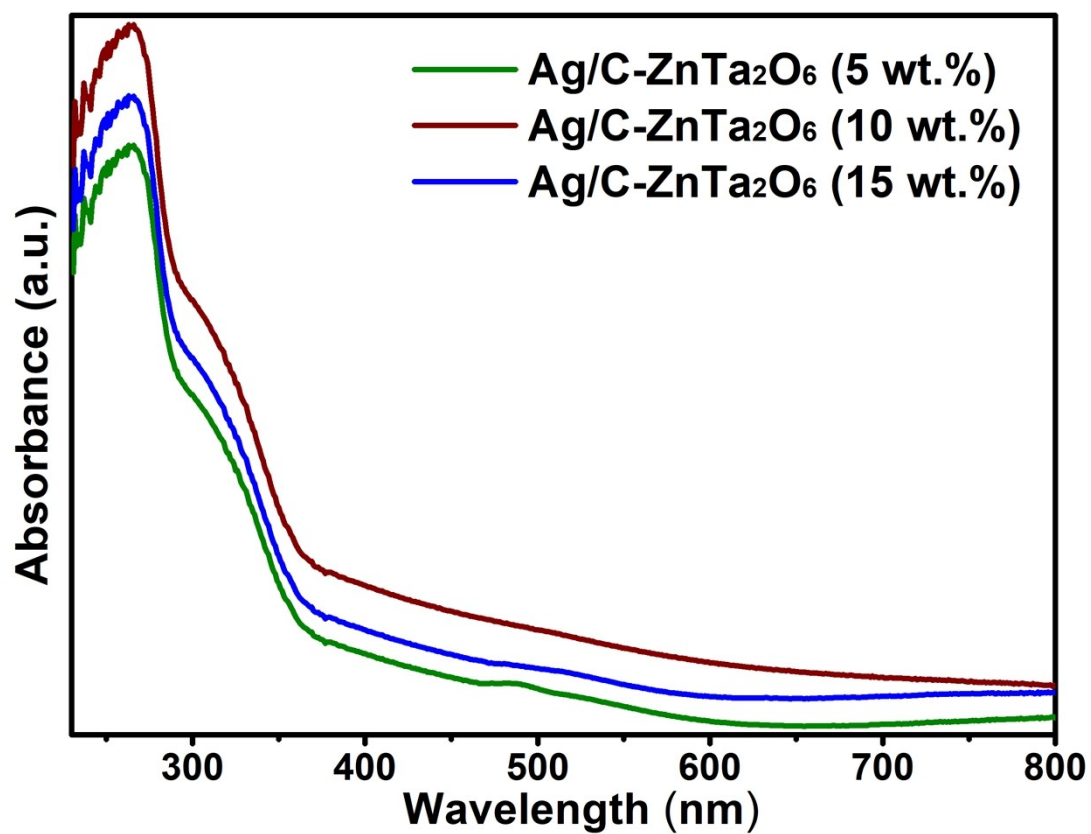

**Fig. S4.** UV-vis absorption spectra of Ag/C-ZnNb<sub>2</sub>O<sub>6</sub> with different initial loading content of silver.
